# Supplementary material for: Silver–pyrazole complexes as hybrid multifunctional materials with metallomesogenic and photoluminescent behaviour
Source: Royal Society of Chemistry journal article supplement (doi:10.1039/c2dt31750h), 2012-11-05
Supplement: c2dt31750h.pdf [file c2dt31750h.pdf]

## Silver-pyrazole complexes as hybrid multifunctional materials with metallomesogenic and photoluminescent behaviour

Paloma Ovejero,<sup>a</sup> Eduardo Asensio,<sup>a</sup> José Vicente Heras,<sup>a</sup> José Antonio Campo,<sup>a</sup> Mercedes Cano,<sup>\*a</sup> M. Rosario Torres,<sup>b</sup> Cristina Núñez<sup>c,d</sup> and Carlos Lodeiro<sup>\*,c,d</sup>

**Table S1** Selected bond distances (Å) and angles (°) for [Hpz<sup>R(12)py</sup>] (1)

|        |          |           |          |
|--------|----------|-----------|----------|
| N1–N2  | 1.361(2) | N1–N2–C3  | 104.4(2) |
| N1–C5  | 1.346(3) | N2–N1–C5  | 113.0(2) |
| N2–C3  | 1.334(3) | N2–C3–C4  | 110.8(2) |
| C3–C4  | 1.395(3) | N1–C5–C4  | 105.5(3) |
| C4–C5  | 1.377(3) | C3–C4–C5  | 106.3(2) |
| C5–C6  | 1.460(3) | N2–C3–C11 | 119.5(3) |
| C3–C11 | 1.482(3) | N1–C5–C6  | 122.1(2) |

**Table S2** Hydrogen bond geometries (lengths in Å and angles in degrees) for [Hpz<sup>R(12)py</sup>] (1) and [Ag(Hpz<sup>R(14)py</sup>)<sub>2</sub>][NO<sub>3</sub>]·CH<sub>2</sub>Cl<sub>2</sub> (6·CH<sub>2</sub>Cl<sub>2</sub>)

| Compound                              | D – H ... A                   | d(D – H) | d(H ... A) | d(D ... A) | <(D – H ... A) |
|---------------------------------------|-------------------------------|----------|------------|------------|----------------|
| <b>1</b>                              | N1 – H1 ... N3 <sup>a</sup>   | 1.16     | 2.09       | 3.065(3)   | 139.8          |
|                                       | C15 – H15 ... O2 <sup>b</sup> | 0.93     | 2.74       | 3.65(1)    | 167.0          |
| <b>6·CH<sub>2</sub>Cl<sub>2</sub></b> | N2 – H2 ... O2                | 1.11     | 1.72       | 2.825(8)   | 176.4          |
|                                       | N5 – H5 ... O2                | 1.17     | 1.59       | 2.758(8)   | 171.8          |
|                                       | C59 – H59B – O3 <sup>c</sup>  | 0.97     | 2.37       | 3.21(2)    | 145.1          |
|                                       | C59 – H59A – O4 <sup>d</sup>  | 0.97     | 2.56       | 3.37(2)    | 141.2          |
|                                       | C59 – H59A – O3 <sup>d</sup>  | 0.97     | 2.44       | 3.40(2)    | 168.6          |
|                                       | C22 – H22 – O4 <sup>e</sup>   | 0.93     | 2.64       | 3.54(2)    | 164.6          |

<sup>a</sup>  $-x + 1, -y + 2, -z$ ; <sup>b</sup>  $-x + 1, -y + 1, -z + 1$ ; <sup>c</sup>  $-x + 1, -y + 1, -z + 1$ ; <sup>d</sup>  $x + 1, y, z + 1$ ; <sup>e</sup>  $x + 1, y, z$

**Table S3** Selected bond distances (Å) and angles (°) for [Ag(Hpz<sup>R(14)py</sup>)<sub>2</sub>][NO<sub>3</sub>]·CH<sub>2</sub>Cl<sub>2</sub> (6·CH<sub>2</sub>Cl<sub>2</sub>)

|                    |          |          |          |
|--------------------|----------|----------|----------|
| Ag–N1              | 2.182(7) | N1–Ag–N3 | 66.3(3)  |
| Ag–N3              | 2.720(8) | N1–Ag–N4 | 114.5(3) |
| Ag–N4              | 2.423(7) | N1–Ag–N6 | 164.6(2) |
| Ag–N6              | 2.246(7) | N3–Ag–N4 | 168.0(2) |
| Ag–Ag <sup>a</sup> | 3.152(2) | N3–Ag–N6 | 105.2(3) |
| N7–O2              | 1.260(8) | N4–Ag–N6 | 71.0(3)  |
| N7–O3              | 1.213(8) | O2–N7–O3 | 119.3(9) |
| N7–O4              | 1.223(8) | O2–N7–O4 | 119.0(9) |
|                    |          | O3–N7–O4 | 121.6(9) |

<sup>a</sup>  $-x + 1, -y + 2, -z$

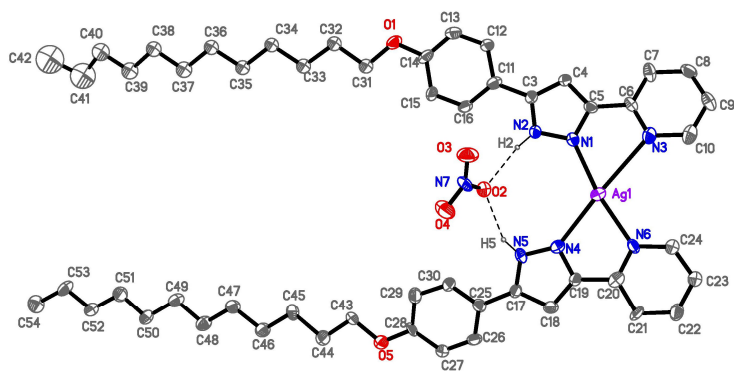

Figure S1 Ortep plot for [Ag(Hpz<sup>R(12)</sup>py)<sub>2</sub>][NO<sub>3</sub>]<sub>5</sub>
